# Supplementary material for: Contrasting physical controls on phosphorus transport to shallow groundwater at the hillslope scale
Source: Copernicus journal article supplement (doi:10.5194/hess-2020-248), 2020-07-21
Supplement: Supplementary file 1 [file hess-2020-248-supplement.pdf]

## S1: Soil Water Retention Curve modelling steps and procedures

The bimodal van Genuchten model of Durner (Durner, 1994) was chosen for the retention fitting:

$$S_e(h) = \sum_{i=1}^2 \omega_i \left[ \frac{1}{1+(\alpha_i|h|)^{n_i}} \right]^{1-\frac{1}{n_i}} \quad \text{Eq. (1)}$$

where  $\omega_1$  [-] and  $\omega_2$  [-] ( $\omega_1 + \omega_2 = 1$ ) are the weight of each sub-function. Each of the sub-functions has its own shape parameters:  $\alpha_i$  [ $\text{cm}^{-1}$ ] that is related to the inverse of the air-entry pressure, and  $n_i$  [-] that controls both the shape of the retention curve at the air-entry region and the asymptotic curvature towards the residual water content.

The Mualem's predictive model (Mualem, 1976) was chosen for the saturated hydraulic conductivity ( $K_s$ ) fitting. It predicts the shape of the conductivity function from the shape of the retention function.

$$K_r(S_e(h)) = S_e^\tau \left[ \frac{\int_0^{S_e} h^{-1} dS_e(h)}{\int_0^1 h^{-1} dS_e(h)} \right]^2 \quad \text{Eq. (2)}$$

where  $\tau$  [-] is a tortuosity parameter.

The combination of the bimodal Durner retention function with the Mualem's K-model yields to (Priesack and Durner, 2006):

$$K(h) = K_s \left[ \sum_{j=1}^2 \omega_j \left[ 1 + (\alpha_j|h|)^{n_j} \right]^{\frac{1}{n_j}-1} \right]^\tau \cdot \left[ \frac{\sum_{j=1}^2 \omega_j \alpha_j \left\{ 1 - (\alpha_j|h|)^{n_j-1} \left[ 1 + (\alpha_j|h|)^{n_j} \right]^{\frac{1}{n_j}-1} \right\}}{\sum_{j=1}^2 \omega_j \alpha_j} \right]^2 \quad \text{Eq. (3)}$$

where  $j$  are indices for the parameters of each van Genuchten function, and  $\omega_j$  are the weights of both partial functions. The following restriction applies:  $0 < \omega_j < 1$  and  $\sum \omega_j = 1$ .

Durner, W.: Hydraulic conductivity estimation for soils with heterogeneous pore structure, *Water Resour Res.*, 30, 211-223, 1994

Mualem, Y.: A new model for predicting the hydraulic conductivity of unsaturated porous media, *Water Resour Res.*, 12, 513-522, 1976

Priesack, E. and Durner, W.: Closed-Form Expression for the Multi-Modal Unsaturated Conductivity Function, *Vadose Zone Journal*, 5(1), 121-124, 2006

## S2: Calculation of additional parameters

Total porosity  $\phi$  [%] was calculated as follows:

$$\phi = 1 - (\rho_b/\rho_p) \quad \text{Eq. (4)}$$

where  $\rho_b$  is the soil bulk density [ $\text{g cm}^{-3}$ ] and  $\rho_p$  is a default particle density of  $1.6 \text{ g cm}^{-3}$ .

Air capacity  $\varepsilon$  [%] was calculated as follows (Reynolds et al., 2009):

$$\varepsilon = \phi - \theta_{fc} \quad \text{Eq. (5)}$$

where  $\phi$  is the total porosity [%] and  $\theta_{fc}$  the water content at field capacity [%].

Soil pore size from and above which water was withdrawn at a pressure step  $pF$  [-] was calculated as follows (Reynolds et al., 2009):

$$r_i = \left( \frac{2*\sigma*\cos\alpha}{P_i} \right) = \left( \frac{2*\sigma*\cos\alpha}{\rho*g*\left(\frac{10^{pF_i}}{100}\right)} \right) \cdot 10^9 \quad \text{Eq. (6)}$$

where  $r$  is the tube or pore radius [nm],  $\sigma$  is the surface tension of water ( $72.75 \cdot 10^{-3} \text{ J m}^{-2}$  at  $20 \text{ }^\circ\text{C}$ ),  $\alpha$  is the contact angle which is here assumed to be zero,  $P$  is the water pressure [Pa],  $\rho$  is the water density ( $10^3 \text{ g m}^{-3}$  at  $20 \text{ }^\circ\text{C}$ ),  $g$  the acceleration due to gravity ( $9.80 \text{ m s}^{-2}$ ) and  $P_F = \log_{10}(h)$ .

Soil pores were classified into three size fractions: macropores ( $r > 50 \text{ nm}$ ), mesopores ( $50 \geq r > 2 \text{ nm}$ ), and micropores ( $r \leq 2 \text{ nm}$ ) (Kuila and Prasad, 2013; Wang et al., 2020).

Kuila, U. and Prasad, M.: Specific surface area and pore-size distribution in clays and shales, *Geophys Prospect.*, 61, 341-362, 2013

Reynolds, W. D., Drury, C. F., Tan, C. S., Fox, C. A., and Yang, X.M.: Use of indicators and pore volume-function characteristics to quantify soil physical quality, *Geoderma*, 152, 252-263, 2009

Wang, H., Tan, J., Ge, Y., Li, J., Yan, X., Wang, C. et al.: Pore morphology and fractal dimension of ash deposited in catalyst diesel particulate filter, *Environmental Science and Pollution Research*, 2020

**Table S3: Soil physical and hydraulic data for DS**

| Depth       | Rep | Sand  | Silt  | Clay  | Texture       | $\rho_b$           | $\alpha_1$       | $n_1$        | $\alpha_2$       | $n_2$        | $\omega_2$   | $\theta_r$                         | $\theta_s$                         | $E_{RMS}$<br>$\theta$ | $K_s$              | $E_{RMS}$<br>$K_s$ | $\phi$ | macro | meso | micro | $\varepsilon$ |
|-------------|-----|-------|-------|-------|---------------|--------------------|------------------|--------------|------------------|--------------|--------------|------------------------------------|------------------------------------|-----------------------|--------------------|--------------------|--------|-------|------|-------|---------------|
|             |     | %     | %     | %     |               | g cm <sup>-3</sup> | cm <sup>-1</sup> | -            | cm <sup>-1</sup> | -            | -            | cm <sup>3</sup><br>cm <sup>3</sup> | cm <sup>3</sup><br>cm <sup>3</sup> |                       | cm d <sup>-1</sup> |                    | %      | %     | %    | %     | %             |
| 5-10<br>cm  | 1   |       |       |       |               | 0.85               | 0.500            | 1.470        | 0.002            | 1.262        | 0.658        | 0.00                               | 0.69                               | 0.0053                | 4 110              | 0.1351             | 67     | 53    | 9    | 3     | 18            |
|             | 2   | 56.43 | 32.22 | 11.35 | Sandy<br>Loam | 1.05               | 0.002            | 1.418        | 0.391            | 1.486        | 0.423        | 0.00                               | 0.55                               | 0.0050                | 567                | 0.1886             | 60     | 49    | 5    | 1     | 23            |
|             | 3   |       |       |       |               | 0.80               | 0.167            | 6.267        | 0.016            | 1.248        | 0.822        | 0.13                               | 0.65                               | 0.0325                | 3                  | 0.9046             | 69     | 43    | 5    | 2     | 19            |
|             | 4   |       |       |       |               | <b>0.84</b>        | <b>0.500</b>     | <b>1.816</b> | <b>0.004</b>     | <b>1.256</b> | <b>0.618</b> | <b>0.00</b>                        | <b>0.63</b>                        | 0.0024                | <b>1 914</b>       | 0.1033             | 68     | 51    | 7    | 3     | 28            |
| 30-35<br>cm | 1   |       |       |       |               | 0.94               | 0.500            | 1.497        | 0.004            | 1.303        | 0.459        | 0.12                               | 0.63                               | 0.0089                | 23                 | 0.4920             | 64     | 44    | 4    | 1     | 24            |
|             | 2   | 57.30 | 32.24 | 10.46 | Sandy<br>Loam | 1.04               | 0.284            | 1.174        | 0.001            | 1.591        | 0.610        | 0.00                               | 0.60                               | 0.0033                | 396                | 0.1467             | 60     | 50    | 6    | 2     | 09            |
|             | 3   |       |       |       |               | <b>0.86</b>        | <b>0.177</b>     | <b>2.159</b> | <b>0.090</b>     | <b>1.135</b> | <b>0.737</b> | <b>0.00</b>                        | <b>0.51</b>                        | 0.0058                | <b>2 892</b>       | 0.0746             | 67     | 38    | 5    | 3     | 36            |
|             | 4   |       |       |       |               | 0.95               | 0.500            | 1.010        | 0.500            | 1.381        | 0.943        | 0.27                               | 0.57                               | 0.0116                | 7                  | 0.2474             | 63     | 28    | 1    | 0     | 27            |

*Data indicated in bold are soil core data used as input parameters in Hydrus*

**Table S4: Soil physical and hydraulic data for MS**

| Depth       | Rep | Sand  | Silt  | Clay  | Texture | $\rho_b$           | $\alpha_1$       | $n_1$        | $\alpha_2$       | $n_2$        | $\omega_2$   | $\theta_r$                         | $\theta_s$                         | $E_{RMS}$<br>$\theta$ | $K_s$              | $E_{RMS}$<br>$K_s$ | $\phi$ | macro | meso | micro | $\varepsilon$ |
|-------------|-----|-------|-------|-------|---------|--------------------|------------------|--------------|------------------|--------------|--------------|------------------------------------|------------------------------------|-----------------------|--------------------|--------------------|--------|-------|------|-------|---------------|
|             |     | %     | %     | %     |         | g cm <sup>-3</sup> | cm <sup>-1</sup> | -            | cm <sup>-1</sup> | -            | -            | cm <sup>3</sup><br>cm <sup>3</sup> | cm <sup>3</sup><br>cm <sup>3</sup> |                       | cm d <sup>-1</sup> |                    | %      | %     | %    | %     | %             |
| 5-10<br>cm  | 1   |       |       |       |         | 1.07               | 0.005            | 1.231        | 0.500            | 1.738        | 0.326        | 0.00                               | 0.67                               | 0.0045                | 7 762              | 0.1932             | 59     | 53    | 8    | 3     | 13            |
|             | 2   | 47.63 | 37.05 | 15.32 | Loam    | 1.31               | 0.231            | 1.303        | 0.001            | 1.602        | 0.522        | 0.00                               | 0.47                               | 0.0056                | 1 480              | 0.1994             | 50     | 43    | 4    | 1     | 15            |
|             | 3   |       |       |       |         | 1.13               | 0.320            | 1.522        | 0.004            | 1.214        | 0.630        | 0.00                               | 0.57                               | 0.0039                | 2 251              | 0.1582             | 57     | 43    | 7    | 3     | 17            |
|             | 4   |       |       |       |         | <b>1.30</b>        | <b>0.001</b>     | <b>1.449</b> | <b>0.191</b>     | <b>1.198</b> | <b>0.483</b> | <b>0.00</b>                        | <b>0.51</b>                        | 0.0028                | <b>431</b>         | 0.1464             | 50     | 40    | 7    | 2     | 09            |
| 30-35<br>cm | 1   |       |       |       |         | <b>1.40</b>        | <b>0.306</b>     | <b>1.311</b> | <b>0.001</b>     | <b>1.629</b> | <b>0.410</b> | <b>0.00</b>                        | <b>0.44</b>                        | 0.0026                | <b>1 038</b>       | 0.0793             | 46     | 39    | 3    | 1     | 18            |
|             | 2   | 39.86 | 44.41 | 15.72 | Loam    | 1.25               | 0.000            | 1.010        | 0.047            | 1.753        | 0.904        | 0.27                               | 0.47                               | 0.0330                | 0                  | 0.9291             | 52     | 18    | 0    | 0     | 15            |
|             | 3   |       |       |       |         | 1.31               | 0.500            | 1.400        | 0.001            | 1.298        | 0.516        | 0.00                               | 0.48                               | 0.0051                | 1 468              | 0.0932             | 50     | 38    | 6    | 2     | 19            |
|             | 4   |       |       |       |         | 1.12               | 0.195            | 1.236        | 0.000            | 1.498        | 0.269        | 0.00                               | 0.52                               | 0.0032                | 6 464              | 0.0841             | 57     | 43    | 6    | 2     | 22            |

*Data indicated in bold are soil core data used as input parameters in Hydrus*

### **S5: Detailed description of hydraulic parameters**

Soil  $\rho_b$  at DS ranged from 0.80 to 1.05 g cm<sup>-3</sup> in shallow soil cores (5 to 10 cm) and from 0.86 to 1.04 g cm<sup>-3</sup> in deep soil cores (30 to 35 cm). At MS, shallow soil  $\rho_b$  ranged from 1.07 to 1.31 g cm<sup>-3</sup> and deeper soil  $\rho_b$  from 1.12 to 1.40 g cm<sup>-3</sup>. Average soil  $\rho_b$  increased with depth (not significantly) in each site: from  $0.89 \pm 0.05$  to  $0.95 \pm 0.03$  g cm<sup>-3</sup> at DS, and from  $1.20 \pm 0.05$  to  $1.27 \pm 0.05$  g cm<sup>-3</sup> at MS. Average soil  $\rho_b$  was higher (not significantly) at MS than DS for both shallow and deeper soil cores.

Shallow soil  $\theta_s$  at DS ranged from 0.55 to 0.69 cm<sup>3</sup> cm<sup>-3</sup> and from 0.51 to 0.63 cm<sup>3</sup> cm<sup>-3</sup> in deeper soil. At MS, values ranged from 0.47 to 0.67 cm<sup>3</sup> cm<sup>-3</sup> in shallow soil and from 0.44 to 0.52 cm<sup>3</sup> cm<sup>-3</sup> in deeper soil. Average soil  $\theta_s$  decreased with depth (not significantly) in each site: from  $0.63 \pm 0.03$  to  $0.58 \pm 0.02$  cm<sup>3</sup> cm<sup>-3</sup> at DS, and from  $0.55 \pm 0.04$  to  $0.48 \pm 0.02$  cm<sup>3</sup> cm<sup>-3</sup> at MS. Average soil  $\theta_s$  was higher (not significantly) at DS than MS for both shallow and deeper soil cores.

Shallow soil  $\theta_r$  at DS ranged from 0.00 to 0.13 cm<sup>3</sup> cm<sup>-3</sup> and from 0.00 to 0.27 cm<sup>3</sup> cm<sup>-3</sup> in deeper soil. At MS, values were equal to 0.00 cm<sup>3</sup> cm<sup>-3</sup> in shallow soil and ranged from 0.00 to 0.27 cm<sup>3</sup> cm<sup>-3</sup> in deeper soil. Average soil  $\theta_r$  increased with depth (not significantly) in each site: from  $0.03 \pm 0.03$  to  $0.10 \pm 0.06$  cm<sup>3</sup> cm<sup>-3</sup> at DS, and from  $0.00 \pm 0.00$  to  $0.07 \pm 0.06$  cm<sup>3</sup> cm<sup>-3</sup> at MS. Average soil  $\theta_r$  was higher (not significantly) at DS than MS for both shallow and deeper soil cores.

Soil  $K_s$  at DS ranged from 3 to 4 110 cm d<sup>-1</sup> and from 7 to 2 892 cm d<sup>-1</sup> in shallow and deeper soil, respectively. At MS,  $K_s$  ranged from 431 to 7 762 cm d<sup>-1</sup> and from 0 to 6 464 cm d<sup>-1</sup> in shallow and deeper soil, respectively. At both sites and for both depths, values were very variable. Average  $K_s$  decreased with depth (not significantly) at each site: from  $1\ 648 \pm 791$

to  $829 \pm 600 \text{ cm d}^{-1}$  at DS, and from  $2\,981 \pm 1\,417$  to  $2\,242 \pm 1\,248 \text{ cm d}^{-1}$  at MS. Average  $K_s$  was higher (not significantly) at MS than at DS for both shallow and deeper soil cores.

Soil  $\phi$  at DS ranged from 60 to 69 % and from 60 to 67 % in shallow and deeper soil, respectively. At MS, values ranged from 50 to 59 % in shallow soil and from 46 to 57 % in deeper soil. Average  $\phi$  decreased with depth (not significantly) at each site: from  $66 \pm 2$  to  $64 \pm 1$  % at DS, and from  $54 \pm 2$  to  $51 \pm 2$  % at MS. Average  $\phi$  was higher (not significantly) at DS than MS for both shallow and deeper soil cores.

Soil  $\varepsilon$  at DS ranged from 18 to 28 % and from 9 to 36 % in shallow and deeper soil, respectively. At MS, values ranged from 9 to 17 % in shallow soil and from 15 to 22 % in deeper soil. Average  $\varepsilon$  increased with depth (not significantly) at each site: from  $22 \pm 5$  to  $24 \pm 2$  % at DS, and from  $14 \pm 1$  to  $19 \pm 2$  % at MS. Average  $\varepsilon$  was higher (not significantly) at DS than MS for both shallow and deeper soil cores.

Soil macroporosity at DS ranged from 43 to 53 % in shallow soil and from 28 to 50 % in deeper soil. At MS, values ranged from 40 to 53 % and from 18 to 43 % in shallow and deep soil cores, respectively. Average soil macroporosity significantly decreased with depth at MS (from  $45 \pm 2$  to  $35 \pm 4$  %) but not significantly at DS (from  $49 \pm 2$  to  $40 \pm 5$  %). Average soil macroporosity was higher (not significantly) at DS than MS for both shallow and deeper soil cores.

Soil mesoporosity at DS ranged from 5 to 9 % in shallow soil and from 1 to 6 % in deeper soil. At MS, values ranged from 4 to 8 % and from 0 to 6 %. Average soil mesoporosity were the same at DS and MS for both shallow and deeper soil cores and decreased with depth (not significantly) from  $6 \pm 3$  to  $4 \pm 2$  %.

Soil microporosity at DS ranged from 1 to 3 % in both shallow and deeper soil. At MS, values ranged from 1 to 3 % in shallow soil and from 0 to 2 % in deeper soil. Average soil microporosity were the same at DS and MS for both shallow and deeper soil cores and decreased (not significantly) with depth from  $2 \pm 1$  to  $1 \pm 1\%$ .

**Table S6: List and characteristics of rainfall events occurring in 2017**

| Event          | Total rainfall [mm] | Duration [h] | Max rainfall [mm h <sup>-1</sup> ] | Total rainfall 7 days before [mm] | Start             | End               | Category <sup>a</sup> |
|----------------|---------------------|--------------|------------------------------------|-----------------------------------|-------------------|-------------------|-----------------------|
| 1              | 37.6                | 40           | 9.6                                | 0.2                               | 05/01/2017        | 07/01/2017        | D                     |
| 2              | 5.6                 | 50           | 0.8                                | 40                                | 12/01/2017        | 14/01/2017        | A                     |
| 3              | 7.6                 | 15           | 1.6                                | 0.4                               | 23/01/2017        | 24/01/2017        | A                     |
| 4              | 35.4                | 120          | 3.6                                | 8                                 | 26/01/2017        | 31/01/2017        | D                     |
| 5              | 10.4                | 56           | 2.2                                | 35.4                              | 01/02/2017        | 03/02/2017        | B                     |
| <b>(R1) 6</b>  | <b>19</b>           | <b>29</b>    | <b>3.2</b>                         | <b>25.4</b>                       | <b>06/02/2017</b> | <b>07/02/2017</b> | <b>B</b>              |
| 7              | 8.6                 | 49           | 0.8                                | 22.2                              | 12/02/2017        | 14/02/2017        | A                     |
| 8              | 15.8                | 28           | 2                                  | 12.4                              | 17/02/2017        | 18/02/2017        | B                     |
| 9              | 5.4                 | 40           | 2.2                                | 20                                | 21/02/2017        | 23/02/2017        | A                     |
| 10             | 8                   | 32           | 1.8                                | 8                                 | 26/02/2017        | 27/02/2017        | A                     |
| 11             | 35.2                | 72           | 4.2                                | 14                                | 02/03/2017        | 05/03/2017        | D                     |
| 12             | 17.6                | 57           | 2.4                                | 46.8                              | 06/03/2017        | 08/03/2017        | B                     |
| 13             | 6.4                 | 15           | 2.8                                | 30.4                              | 11/03/2017        | 12/03/2017        | A                     |
| 14             | 26                  | 81           | 4.2                                | 2.4                               | 19/03/2017        | 22/03/2017        | C                     |
| 15             | 32                  | 80           | 5.6                                | 18.6                              | 28/03/2017        | 31/03/2017        | D                     |
| 16             | 10.4                | 24           | 3.6                                | 1.8                               | 29/04/2017        | 30/04/2017        | B                     |
| 17             | 5.2                 | 22           | 1.4                                | 0.4                               | 13/05/2017        | 14/05/2017        | A                     |
| 18             | 24                  | 32           | 3.6                                | 5.6                               | 14/05/2017        | 16/05/2017        | C                     |
| 19             | 8.2                 | 22           | 1.8                                | 7                                 | 26/05/2017        | 27/05/2017        | A                     |
| 20             | 12                  | 15           | 1.8                                | 10                                | 01/06/2017        | 01/06/2017        | B                     |
| 21             | 18.6                | 49           | 3.4                                | 16                                | 04/06/2017        | 06/06/2017        | B                     |
| 22             | 35                  | 43           | 6.2                                | 33                                | 07/06/2017        | 08/06/2017        | D                     |
| <b>(R2) 23</b> | <b>32.8</b>         | <b>15</b>    | <b>6.2</b>                         | <b>55.8</b>                       | <b>09/06/2017</b> | <b>10/06/2017</b> | <b>D</b>              |
| 24             | 17.2                | 15           | 4.6                                | 1.2                               | 26/06/2017        | 27/06/2017        | B                     |
| 25             | 35.6                | 18           | 19.2                               | 0.4                               | 18/07/2017        | 19/07/2017        | D                     |
| 26             | 27.8                | 47           | 6                                  | 36                                | 20/07/2017        | 22/07/2017        | C                     |
| 27             | 10                  | 10           | 4.2                                | 63.4                              | 25/07/2017        | 26/07/2017        | B                     |
| 28             | 9.2                 | 30           | 2                                  | 37.8                              | 27/07/2017        | 28/07/2017        | A                     |
| 29             | 13.8                | 39           | 3                                  | 21                                | 01/08/2017        | 03/08/2017        | B                     |
| 30             | 7.2                 | 40           | 1                                  | 16.2                              | 06/08/2017        | 07/08/2017        | A                     |
| 31             | 14.4                | 39           | 2.4                                | 10.4                              | 13/08/2017        | 15/08/2017        | B                     |
| 32             | 7.4                 | 12           | 2.4                                | 16.2                              | 16/08/2017        | 16/08/2017        | A                     |
| 33             | 10.6                | 10           | 4.4                                | 24                                | 20/08/2017        | 20/08/2017        | B                     |
| 34             | 42.2                | 23           | 7.4                                | 9                                 | 02/09/2017        | 03/09/2017        | E                     |
| 35             | 18.4                | 9            | 5.2                                | 49.4                              | 04/09/2017        | 05/09/2017        | B                     |
| 36             | 7                   | 6            | 3.8                                | 5.6                               | 12/09/2017        | 12/09/2017        | A                     |
| 37             | 22.4                | 44           | 4.6                                | 4                                 | 19/09/2017        | 21/09/2017        | C                     |
| 38             | 7                   | 6            | 2.4                                | 28                                | 23/09/2017        | 23/09/2017        | A                     |
| 39             | 28.4                | 29           | 5.6                                | 32.2                              | 26/09/2017        | 28/09/2017        | C                     |
| 40             | 14.4                | 66           | 2.6                                | 39                                | 28/09/2017        | 01/10/2017        | B                     |
| 41             | 10.2                | 18           | 2.2                                | 3                                 | 10/10/2017        | 11/10/2017        | B                     |
| 42             | 37.6                | 53           | 6.4                                | 12.8                              | 12/10/2017        | 14/10/2017        | D                     |

|                |             |           |            |             |                   |                   |          |
|----------------|-------------|-----------|------------|-------------|-------------------|-------------------|----------|
| <b>43</b>      | 7.8         | 16        | 2.8        | 53          | 16/10/2017        | 16/10/2017        | A        |
| <b>(R3) 44</b> | <b>50.6</b> | <b>40</b> | <b>6.4</b> | <b>57.2</b> | <b>18/10/2017</b> | <b>19/10/2017</b> | <b>E</b> |
| <b>45</b>      | 16          | 29        | 4          | 70          | 20/10/2017        | 21/10/2017        | B        |
| <b>46</b>      | 7.6         | 13        | 2.4        | 74.4        | 22/10/2017        | 23/10/2017        | A        |
| <b>47</b>      | 10          | 21        | 3.6        | 74.2        | 23/10/2017        | 24/10/2017        | B        |
| <b>48</b>      | 3           | 14        | 0.4        | 83.6        | 25/10/2017        | 26/10/2017        | A        |
| <b>49</b>      | 8.4         | 20        | 1.6        | 3.8         | 19/11/2017        | 20/11/2017        | A        |
| <b>50</b>      | 29          | 47        | 6.2        | 11.8        | 21/11/2017        | 23/11/2017        | C        |
| <b>51</b>      | 13.8        | 51        | 2.4        | 0.6         | 05/12/2017        | 07/12/2017        | B        |
| <b>52</b>      | 18.6        | 31        | 5.6        | 15.6        | 09/12/2017        | 10/12/2017        | B        |
| <b>53</b>      | 17          | 62        | 3.4        | 34          | 12/12/2017        | 14/12/2017        | B        |
| <b>54</b>      | 7.6         | 16        | 1.4        | 12          | 24/12/2017        | 25/12/2017        | A        |
| <b>55</b>      | 17.6        | 15        | 4.2        | 18          | 26/12/2017        | 26/12/2017        | B        |
| <b>56</b>      | 37          | 83        | 5.4        | 33          | 28/12/2017        | 31/12/2017        | D        |

<sup>a</sup>A = 5.0-9.9 mm, B = 10.0-19.9 mm, C = 20.0-29.9 mm, D = 30.0-39.9 mm, E =  $\geq$ 40 mm
